# Supplementary material for: miR-22-3p/PGC1β Suppresses Breast Cancer Cell Tumorigenesis via PPARγ
Source: Hindawi journal article supplement (doi:10.1155/2021/6661828), 2021-03-12

( Fig. S1A )

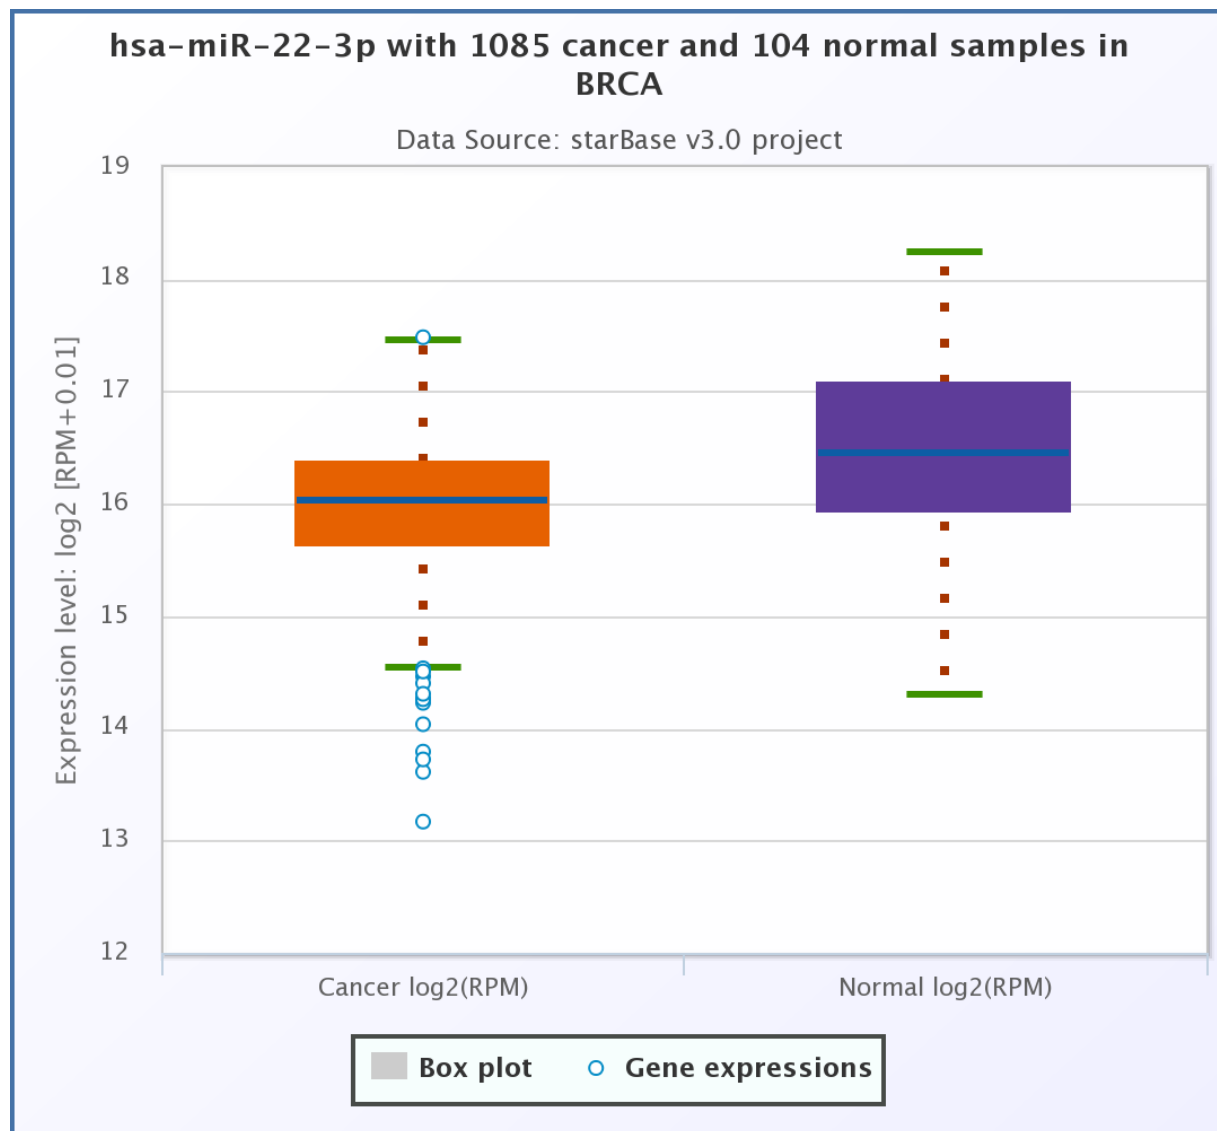

Supplement: f1 [file 6661828.f1.pdf]
